# Supplementary material for: New progress in bismuth sulfide nanofabrics: high-yield synthesis, and study on growth and stability mechanism
Source: Royal Society of Chemistry journal article supplement (doi:10.1039/c2ce25454a), 2012-01-01
Supplement: c2ce25454a.pdf [file c2ce25454a.pdf]

## Supplementary Information for

### New progress in bismuth sulfide nanofabrics: high-yield synthesis, and study on growth and stability mechanism

Pengfei Hu<sup>\*a</sup> · Yali Cao<sup>b</sup>

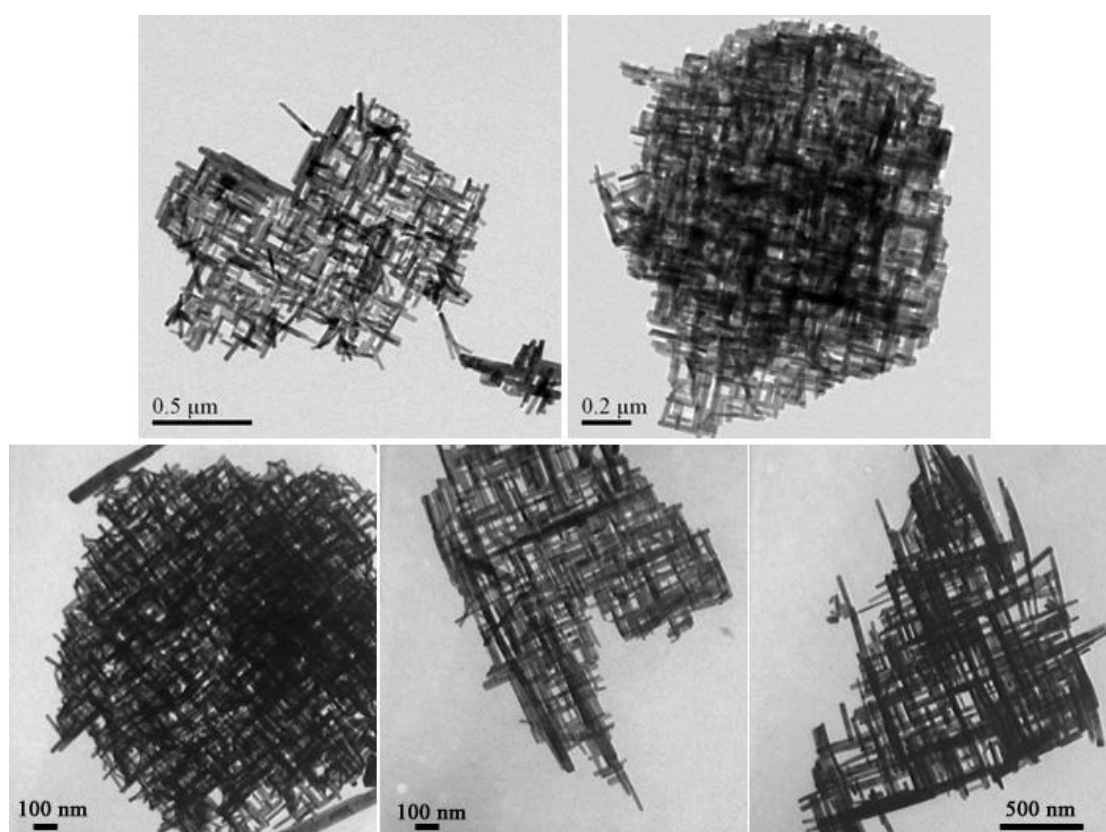

**Figure S1.** Low-resolution TEM images of Bi<sub>2</sub>S<sub>3</sub> nanorod networks with varied outlines.

<sup>\* a</sup> Laboratory for Microstructures, Shanghai University, Shanghai 200444, P. R. China.  
E-mail: [hpf-hqx@shu.edu.cn](mailto:hpf-hqx@shu.edu.cn); Tel/Fax: +86-21-66135030.

<sup>b</sup> Institute of Applied Chemistry, Xinjiang University, Urumqi, Xinjiang 830046, P. R. China.

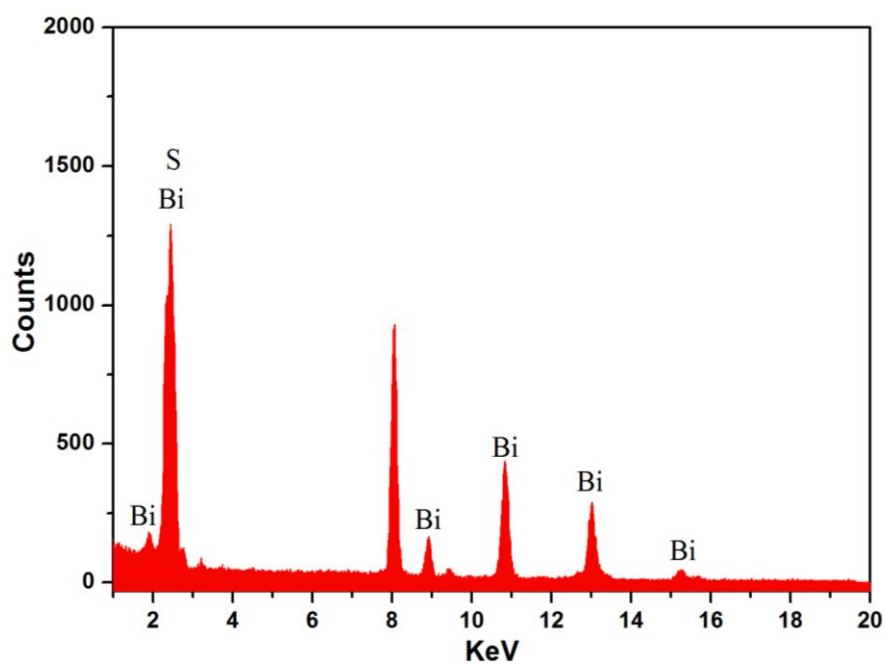

**Figure S2.** EDS spectrum taken from the  $\text{Bi}_2\text{S}_3$  sample prepared with reaction time of 8 hours.

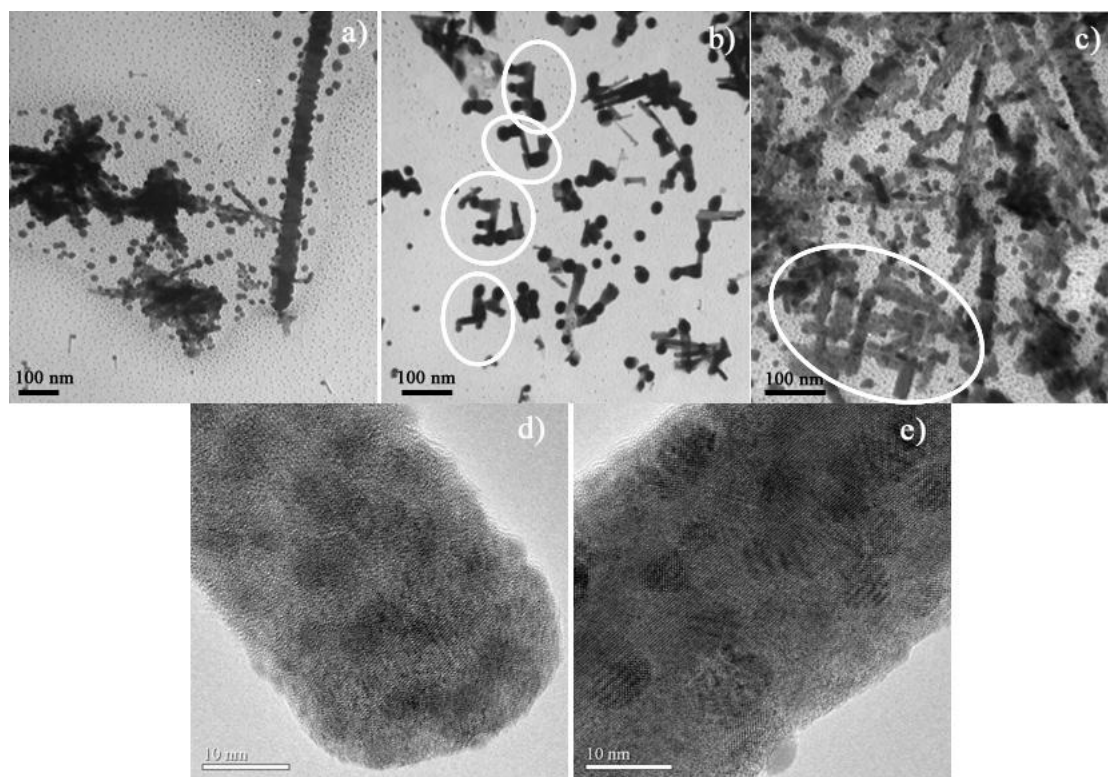

**Figure S3.** (a-c) Low-resolution TEM images of products prepared with reaction time of 2 hours. White dotted ellipses in (b) and (c) illustrated right-angled branched nanocrystals and embryonic quadrate frame, respectively. (d, e) HRTEM images of end and body of nanorod collected at 4 h, revealing the nanorods are composed of building nanoparticles.

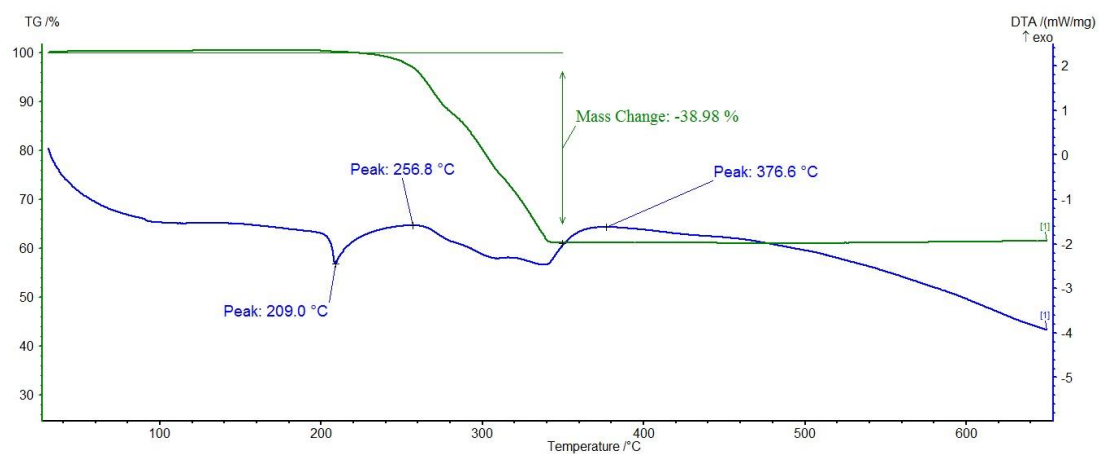

**Figure S4.** TG/DTA curves of compound  $\text{Bi}^{3+}$ -(APDC) under atmosphere.

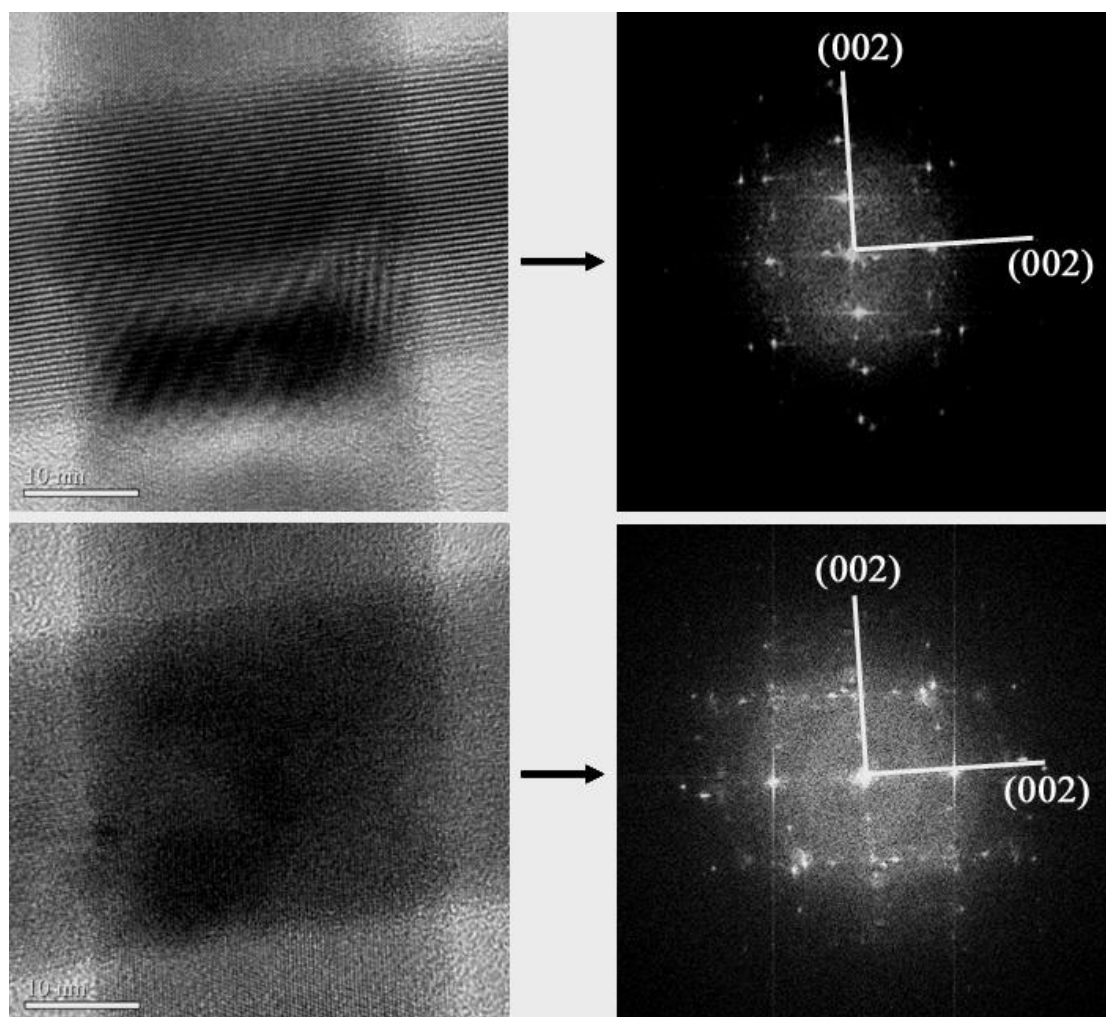

**Figure S5.** HRTEM images of sectional lattices and their FFTs, revealing the precise crystallographic registry between crossed nanorods, and the overlapping diffraction patterns with rotational angle  $90^\circ$ , and the nanorods elongated in the [002] direction respectively.

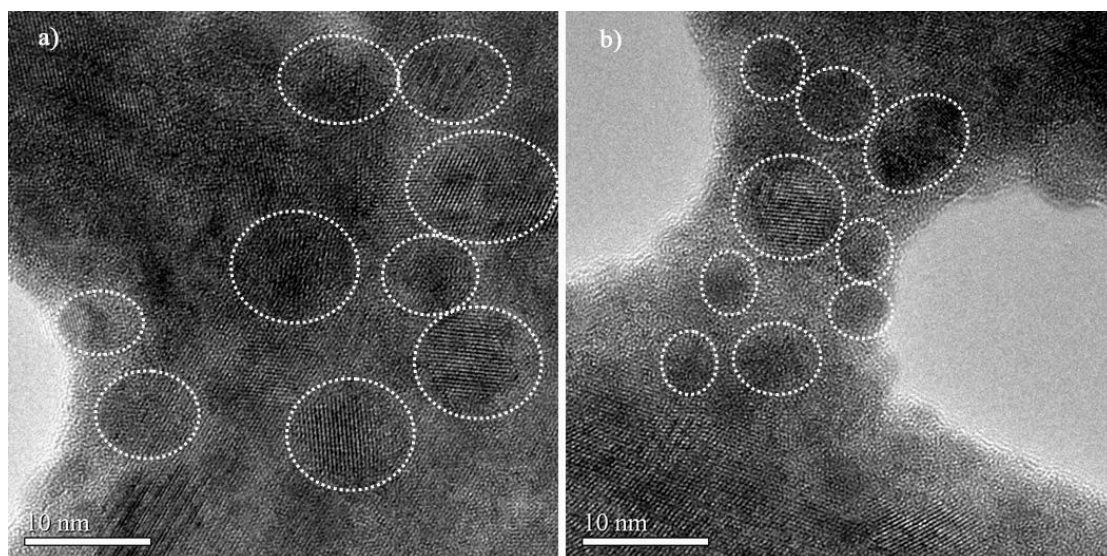

**Figure S6.** (a, b) HRTEM image of a junction and a sub-nanorod collected at 4 h. White dotted ellipses in them indicated the primary building nanounits.
